# Supplementary material
Source: PubMed Central journal article supplement (PMC4705438)
Supplement: NIHMS64012-supplement-1.pdf [file NIHMS64012-supplement-1.pdf]

## Supplementary Material

### Methods

#### *Transplant details*

Eighty (85%) transplants were performed using a reduced-intensity conditioning (RIC) regimen containing Fludarabine 125 mg/m<sup>2</sup> and Melphalan 140 mg/m<sup>2</sup>; or Fludarabine 120 mg/m<sup>2</sup> and Cyclophosphamide 1200 mg/m<sup>2</sup>. Fourteen (15%) used myeloablative conditioning (MAC) with Cyclophosphamide 120 mg/kg and 14.4 Gy TBI; or Cyclophosphamide 120 mg/kg and Busulphan 16 mg/kg. Patients with MAC received Methotrexate 15 mg/m<sup>2</sup> on day +1 and 10 mg/m<sup>2</sup> on day +3, +6, and +11, whilst Fludarabine/Melphalan sibling allografts received Methotrexate 5 mg/m<sup>2</sup> on day +1, +3, +6, and +11.

#### *Flow cytometry*

PBSC grafts were analysed by flow cytometry using CD45/CD3/CD4/CD8 Multitest with Trucount tubes (342447) and anti-CD3 PE-Cy7 (557851), CD4 FITC (555346), CD19 PE (555413), CD56 APC (555518) [BD Biosciences, Oxford, UK], and CD8 APC Alexa-Fluor 750 (27-0088, eBiosciences, Hatfield, UK). To quantify Tregs, defined phenotypically as CD3<sup>+</sup>CD4<sup>+</sup>CD8<sup>-</sup>CD25<sup>+</sup>FOXP3<sup>+</sup>CD127<sup>dim/-</sup> cells, peripheral blood mononuclear cells (PBMC) were isolated from PBSC grafts using Ficoll-Paque and stained using anti-CD3 PE-Cy7 (557851), CD4 FITC (555346), CD25 PE (557741) [BD Biosciences]; CD8 APC-Alexa-Fluor 750 (27-0088), and CD127 PerCP-Cy5.5 (45-1278) [eBiosciences]. Stained PBMC were washed, fixed and permeabilized, and stained with anti-FOXP3 APC (130-093-013, Miltenyi Biotech, Bisley, UK). Flow cytometry was performed on an LSR II Flow Cytometer

using FACS Diva software (BD Biosciences). Staining controls were fluorescence-minus-one, isotype controls, and antigen negative cells.

### *Statistics*

Sample size was calculated with overall survival as the primary outcome. The historical 3-year overall survival for allogeneic HSCT for Oxford University Hospitals NHS Trust is 60-65%. Based upon these data, this study was designed to detect a difference of 25%, with an estimated 3-year overall survival of 50% and 75% in the low and high Treg/CD4<sup>+</sup> T-cell groups, respectively. With a one-sided model using an  $\alpha$  value of 0.05 and  $\beta$  value of 0.2, the estimated sample size was 45 in each arm.

Variables initially considered in univariate analysis were recipient and donor age; sex mismatch (female donor to male recipient vs other); ABO mismatch (matched/minor vs major/bidirectional); recipient and donor CMV serology; disease (acute leukaemia vs other); disease stage (Early (CR1/chronic phase/untreated) vs Other ( $\geq$  CR2/partial response/active disease)); conditioning (RIC vs MAC); donor (sibling vs unrelated). Graft variables considered were CD34<sup>+</sup>, CD3<sup>+</sup>, CD19<sup>+</sup>, CD3<sup>-</sup>CD56<sup>+</sup>, Treg (CD3<sup>+</sup>CD4<sup>+</sup>CD25<sup>+</sup>FOXP3<sup>+</sup>CD127<sup>dim/-</sup>) dose, and the Treg/CD4<sup>+</sup> T-cell ratio.

**Table S1.** Analysis of the PBSC graft contents.

| A. Cell type                       | Treg dose |          | Treg/CD4 <sup>+</sup> T-cell ratio |          |
|------------------------------------|-----------|----------|------------------------------------|----------|
|                                    | <i>r</i>  | <i>P</i> | <i>r</i>                           | <i>P</i> |
| TNC                                | 0.45      | < 0.0001 | 0.03                               | 0.78     |
| CD34 <sup>+</sup>                  | 0.13      | 0.22     | 0.02                               | 0.86     |
| CD3 <sup>+</sup>                   | 0.65      | < 0.0001 | -0.10                              | 0.35     |
| CD19 <sup>+</sup>                  | 0.53      | < 0.0001 | 0.12                               | 0.25     |
| CD3 <sup>-</sup> CD56 <sup>+</sup> | 0.50      | < 0.0001 | 0.12                               | 0.25     |

| B. Univariate                 | Variable |           | Median | Range       | <i>P</i>          |
|-------------------------------|----------|-----------|--------|-------------|-------------------|
| Treg Counts ( $\times 10^8$ ) | Donor    | Sibling   | 4.35   | 1.73-13.78  | <b>0.01</b>       |
|                               |          | Unrelated | 3.48   | 0.48-10.54  |                   |
|                               | Harvest  | One day   | 3.51   | 0.48-9.62   | <b>&lt; 0.001</b> |
|                               |          | Two days  | 6.76   | 2.36-13.87  |                   |
| Treg/CD4 <sup>+</sup> T cells | Donor    | Sibling   | 0.033  | 0.011-0.086 | <b>0.04</b>       |
|                               |          | Unrelated | 0.026  | 0.008-0.061 |                   |
|                               | Gender   | Male      | 0.030  | 0.008-0.086 | 0.07              |
|                               |          | Female    | 0.028  | 0.014-0.045 |                   |

| C. Multivariate                            | Variable | B     | SE B | $\beta$ | <i>P</i>    | <i>R</i> <sup>2</sup> |
|--------------------------------------------|----------|-------|------|---------|-------------|-----------------------|
| Treg Counts ( $\times 10^8$ )*             | Constant | 0.84  | 0.72 |         | 0.24        | 0.24                  |
|                                            | Harvest  | 3.02  | 0.56 | 0.49    | < 0.001     |                       |
| Treg/CD4 <sup>+</sup> T cells <sup>#</sup> | Constant | -1.44 | 0.04 |         |             | 0.09                  |
|                                            | Donor    | -0.10 | 0.04 | -0.28   | <b>0.01</b> |                       |
|                                            | Gender   | -0.10 | 0.04 | -0.24   | <b>0.03</b> |                       |

(A) Spearman correlation (*r*) between Treg dose ( $\times 10^6$ /kg) or proportion of Tregs (Tregs/CD4<sup>+</sup> T cells), and the dose ( $\times 10^6$ /kg) of the main cell populations in the graft.

(B) Univariate analysis of the Treg counts ( $\times 10^8$ ) and proportion of Tregs (Tregs/CD4<sup>+</sup> T cells) in the graft. Analysed by Mann-Whitney test. (B) Multivariate linear regression of Treg counts ( $\times 10^8$ ) and proportion of Tregs (Tregs/CD4<sup>+</sup> T cells) in the graft. \*Data were transformed using a  $\sqrt{\quad}$  transformation; <sup>#</sup>Data were transformed using a  $\log_{10} [x/(1-x)]$  transformation; Tregs, regulatory T cells.

**Table S2.** Timing and cause of mortality.

| <b>Low Treg/CD4<sup>+</sup> T-cell ratio</b> |                          | <b>High Treg/CD4<sup>+</sup> T-cell ratio</b> |                       |
|----------------------------------------------|--------------------------|-----------------------------------------------|-----------------------|
| <i>Day</i>                                   | <i>Cause</i>             | <i>Day</i>                                    | <i>Cause</i>          |
| 10                                           | Infection                | 18                                            | Venoocclusive disease |
| 16                                           | Infection                | 20                                            | Infection             |
| 35                                           | GvHD                     | 25                                            | Infection             |
| 43                                           | GvHD                     | 59                                            | Pneumonitis           |
| 44                                           | Relapse                  | 146                                           | Relapse               |
| 74                                           | GvHD                     | 157                                           | Relapse               |
| 116                                          | Relapse                  | 171                                           | Relapse               |
| 143                                          | Relapse                  | 199                                           | Relapse               |
| 145                                          | Thrombosis               | 241                                           | GvHD                  |
| 161                                          | Infection                | 304                                           | Relapse               |
| 163                                          | GvHD                     | 339                                           | PTLD                  |
| 198                                          | Relapse                  | 427                                           | Relapse               |
| 221                                          | Relapse                  | 1484                                          | Relapse               |
| 226                                          | GvHD                     |                                               |                       |
| 240                                          | Neuropathy               |                                               |                       |
| 245                                          | GvHD                     |                                               |                       |
| 252                                          | Infection                |                                               |                       |
| 256                                          | GvHD                     |                                               |                       |
| 258                                          | Relapse                  |                                               |                       |
| 315                                          | GvHD                     |                                               |                       |
| 317                                          | GvHD                     |                                               |                       |
| 566                                          | Relapse                  |                                               |                       |
| 747                                          | Intracranial haemorrhage |                                               |                       |
| 845                                          | Relapse                  |                                               |                       |

Tregs, regulatory T cells; PTLD, post-transplant lymphoproliferative disorder.

**Table S3.** Overall survival according to the proportion of Tregs (Tregs/CD4<sup>+</sup> T cells) in the PBSC grafts (quartiles).

**A. Univariate analysis**

| Group                    | Tregs/CD4 <sup>+</sup> T cells | 3-year OS (%) | 95% CI |
|--------------------------|--------------------------------|---------------|--------|
| 1 <sup>st</sup> quartile | 0.0081-0.0222                  | 42            | 26-67  |
| 2 <sup>nd</sup> quartile | 0.0223-0.0295                  | 57            | 40-81  |
| 3 <sup>rd</sup> quartile | 0.0296-0.0393                  | 67            | 50-89  |
| 4 <sup>th</sup> quartile | 0.0394-0.0856                  | 83            | 69-100 |

**B. Multivariate analysis**

| Variable                             | HR           | 95% CI | <i>P</i>  |             |
|--------------------------------------|--------------|--------|-----------|-------------|
| <b>Tregs/CD4<sup>+</sup> T cells</b> | 1st quartile | 1.00   |           |             |
|                                      | 2nd quartile | 0.74   | 0.30-1.82 | 0.51        |
|                                      | 3rd quartile | 0.63   | 0.25-1.56 | 0.32        |
|                                      | 4th quartile | 0.22   | 0.06-0.73 | <b>0.01</b> |
| <b>Recipient CMV</b>                 | Seronegative | 1.00   |           |             |
|                                      | Seropositive | 2.23   | 1.07-4.66 | <b>0.03</b> |

(A) Kaplan-Meier estimation of 3-year overall survival according to the proportion of Tregs (Tregs/CD4<sup>+</sup> T cells) in the grafts, divided by quartiles. (B) Multivariate analysis of overall survival. Variables included in the initial model were the Treg/CD4<sup>+</sup> T-cell ratios in the peripheral blood stem cell grafts (quartiles) adjusting for significant differences between the groups (donor age, donor gender, and CD3<sup>-</sup>CD56<sup>+</sup> cell dose) and variables with *P* < 0.10 in univariate analysis (recipient age, recipient CMV serology, and HLA-mismatch in HvG direction). Tregs, regulatory T cells; OS, overall survival.

**A. No Alemtuzumab (n=36)**

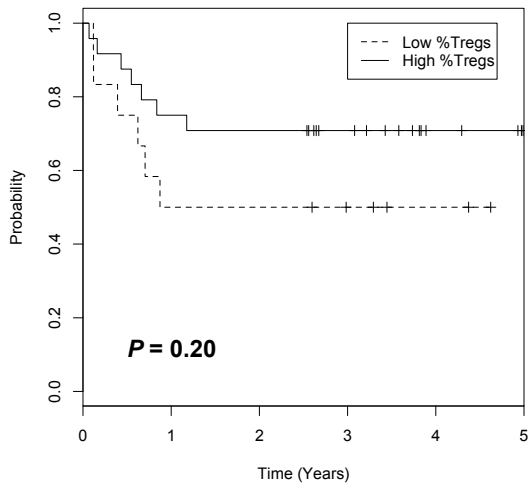

**B. Alemtuzumab (n=58)**

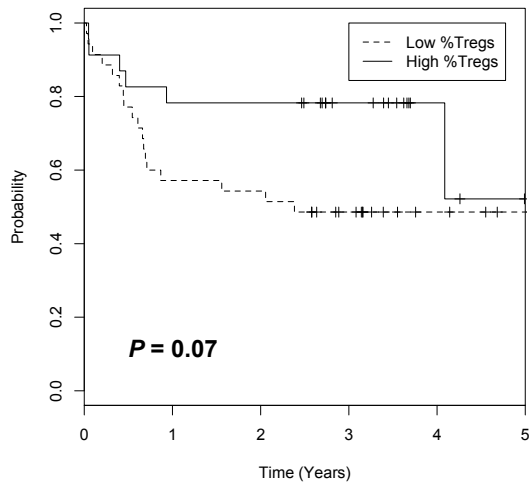

**Figure S1.** Overall survival in T-replete and T-deplete transplants according to the proportion of Tregs (Tregs/CD4<sup>+</sup> T cells) in the graft. (A) No Alemtuzumab conditioning; (B) Alemtuzumab conditioning. Low %Tregs, Tregs/CD4<sup>+</sup> T cells below the median (dotted line); High %Tregs, Tregs/CD4<sup>+</sup> T cells above the median (solid line); Tregs, regulatory T cells.
